# Supplementary material for: Human Endocrine-Disrupting Effects of Phthalate Esters through Adverse Outcome Pathways: A Comprehensive Mechanism Analysis
Source: MDPI journal article supplement (doi:10.3390/ijms241713548), 2023-08-31
Supplement: s1 [file s1]

Supplement Materials

# Human Endocrine-Disrupting Effects of Phthalate Esters through Adverse Outcome Pathways: A Comprehensive Mechanism Analysis

Yunxiang Li <sup>†</sup>, Hao Yang <sup>†</sup>, Wei He and Yu Li <sup>\*</sup>

College of Environmental Science and Engineering, North China Electric Power University, Beijing 102206, China; 120222232055@ncepu.edu.cn (Y.L.); 120212232080@ncepu.edu.cn (H.Y.); 120222132018@ncepu.edu.cn (W.H.)

<sup>\*</sup> Correspondence: 50201549@ncepu.edu.cn

<sup>†</sup> These authors contributed equally to this work.

```

import numpy as np
import pandas as pd
import matplotlib.pyplot as plt
pd.set_option('display.max_rows',None)
pd.set_option('display.max_columns',None)
data=pd.read_excel('C:\\Users\\WIN11\\Desktop\\study\\cjs.xlsx')
X=data.iloc[:,2:]
Y=data.iloc[:,1]
from sklearn.model_selection import train_test_split
x_train,x_test,y_train,y_test=train_test_split(X,Y,test_size = 0.3,random_state=0)
from xgboost import XGBRegressor
import xgboost as xgb
from sklearn.metrics import mean_squared_error
from sklearn.metrics import r2_score

C:\\Users\\WIN11\\Desktop\\1\\lib\\site-packages\\xgboost\\compat.py:36: FutureWarning: pandas.Int64Index is deprecated and will be removed from pandas in a future version. Use pandas.Index with the appropriate dtype instead.
from pandas import MultiIndex, Int64Index

for i in range(1,100):
    xgb_model=xgb.XGBRegressor(
        random_state=0,
        n_estimators=30,
        alpha=17,
        eta=1.45,
        subsample=0.66,
        max_depth=10
    )
    xgb_model.fit(x_train,y_train)
    y_pred = xgb_model.predict(x_test)

    score = r2_score(y_test,y_pred)
# 模型得分
    print("i="+str(i)+"得分",score)

xgb_model=xgb.XGBRegressor(
    random_state=0,
    n_estimators=30,
    alpha=17,
    eta=1.45,
    subsample=0.66,
    max_depth=10
)
xgb_model.fit(x_train,y_train)
y_pred = xgb_model.predict(x_test)

score = r2_score(y_test,y_pred)
R2 = r2_score(y_test,y_pred)
R2

C:\\Users\\WIN11\\Desktop\\1\\lib\\site-packages\\xgboost\\data.py:250: FutureWarning: pandas.Int64Index is deprecated and will be removed from pandas in a future version. Use pandas.Index with the appropriate dtype instead.
    elif isinstance(data.columns, (pd.Int64Index, pd.RangeIndex)):

0.8443402626244294

```

Figure S1. Estrogen single effect XGboost model code

```

import pandas as pd
import numpy as np
from scipy.stats import pearsonr

dataSet = pd.read_excel("C://Users//WIN11//Desktop//study//lyxsj.xlsx")
pearson_result=dataSet.corr()
pearson_result.to_excel("C://Users//WIN11//Desktop//study//pearson.xlsx")

def excuteFilter(x,pearson_result,dataSet,path):
    header=pearson_result.columns
    data = pearson_result.values
    indices = np.triu_indices_from(data)
    [rows, cols] = data.shape
    addlist = []
    removelist = []
    removeindex = []
    for i in range(rows):
        if header[i] not in removelist:
            for j in range(cols):
                if j < i:
                    if data[i, j]>x or data[i, j]<-x:
                        if header[j] in addlist:
                            if header[i] not in removelist:
                                removelist.append(header[i])
                                continue
                        if header[i] not in addlist:
                            addlist.append(header[i])
                        if header[j] not in removelist:
                            removelist.append(header[j])
    retainList = []
    for col in header:
        if col not in removelist:
            retainList.append(col)
            print(col)
    dataSet[retainList].to_excel(path,index = False)

excuteFilter(0.75,pearson_result,dataSet,"C://Users//WIN11//Desktop//study//retainDataSet.xlsx")

import seaborn as sns
import matplotlib.pyplot as plt
dataframe = pd.read_excel("C://Users//WIN11//Desktop//study//retainDataSet.xlsx")
dcorr=dataframe.corr()
plt.rcParams['font.sans-serif']=['Times New Roman']
plt.rcParams['axes.unicode_minus']=False
plt.rcParams['xtick.labelsize']=20
plt.rcParams['ytick.labelsize']=20
plt.subplots(figsize=(30, 30))
fig=sns.heatmap(dcorr,
                cmap='Purples',
                annot=True,
                annot_kws={'size':20},
                fmt=".2f",
                mask=np.triu(np.ones_like(dcorr, dtype=bool))
                )
fig_path="C://Users//WIN11//Desktop//study//retainHeatmap.jpg"
heatmap = fig.get_figure()
heatmap.savefig(fig_path, dpi = 400)

```

Figure S2. Pearson correlation coefficient model code

```

import numpy as np
import pandas as pd
import matplotlib.pyplot as plt
pd.set_option('display.max_rows',None)
pd.set_option('display.max_columns',None)
data=pd.read_excel('C:\\Users\\WIN11\\Desktop\\study\\22.xlsx')
X=data.iloc[:,2:]
Y=data.iloc[:,1]
from sklearn.model_selection import train_test_split
x_train,x_test,y_train,y_test=train_test_split(X,Y,test_size = 0.3,random_state=0)

from sklearn.linear_model import LinearRegression
lr= LinearRegression()
)
from sklearn.metrics import mean_squared_error
from sklearn.metrics import r2_score
lr.fit(x_train,y_train)
y_pred = lr.predict(x_test)
R2 = r2_score(y_test,y_pred)
R2

```

-22444.24575239423

Figure S3. Multiple linear regression model code of AOP initial event of PAEs endocrine disrupting effect

```
import numpy as np
import pandas as pd
import matplotlib.pyplot as plt
pd.set_option('display.max_rows',None)
pd.set_option('display.max_columns',None)
data=pd.read_excel('C:\\Users\\WIN11\\Desktop\\study\\33.xlsx')
X=data.iloc[:,2:]
Y=data.iloc[:,1]
from sklearn.model_selection import train_test_split
x_train,x_test,y_train,y_test=train_test_split(X,Y,test_size = 0.3,random_state=0)
```

```
from sklearn.linear_model import LinearRegression
lr= LinearRegression(
)
from sklearn.metrics import mean_squared_error
from sklearn.metrics import r2_score
lr.fit(x_train,y_train)
y_pred = lr.predict(x_test)
R2 = r2_score(y_test,y_pred)
R2
```

-1363.8238250551356

Figure S4. Multiple linear regression model code of AOP key event of PAEs endocrine disrupting effect

```
import numpy as np
import pandas as pd
import matplotlib.pyplot as plt
pd.set_option('display.max_rows',None)
pd.set_option('display.max_columns',None)
```

```
data=pd.read_excel('22.xlsx')
X=data.iloc[:,2:]
Y=data.iloc[:,1]
from sklearn.model_selection import train_test_split
x_train,x_test,y_train,y_test=train_test_split(X,Y,test_size = 0.3,random_state=0)
from sklearn.ensemble import RandomForestRegressor
from sklearn.metrics import mean_squared_error
from sklearn.metrics import r2_score
```

```
for i in range(1,100):
    RF = RandomForestRegressor(
        n_estimators=2,
        criterion = 'mae',
        random_state=3,
        max_samples=10,
        max_depth=4,
    )
    RF.fit(x_train,y_train)
    y_pred = RF.predict(x_test)

    score =r2_score(y_test,y_pred)
# 模型得分
print("i="+str(i)+"得分",score)
```

```
RF = RandomForestRegressor(
    n_estimators=2,
    criterion = 'mae',
    random_state=3,
    max_samples=10,
    max_depth=4,
)
RF.fit(x_train,y_train)
y_pred = RF.predict(x_test)
R2 = r2_score(y_test,y_pred)
R2
```

C:\Users\WIN11\Desktop\1\lib\site-packages\sklearn\ensemble\\_forest.py:403: FutureWarning: Criterion 'mae' was deprecated in v1.0 and will be removed in version 1.2. Use 'criterion='absolute\_error'' which is equivalent.  
warn(

0.8518272706950072

Figure S5. random forest regression model code of AOP initial event of PAEs endocrine disrupting effect

```

import numpy as np
import pandas as pd
import matplotlib.pyplot as plt
pd.set_option('display.max_rows',None)
pd.set_option('display.max_columns',None)
data=pd.read_excel('C:\\Users\\WIN11\\Desktop\\study\\33.xlsx')
X=data.iloc[:,2:]
Y=data.iloc[:,1]
from sklearn.model_selection import train_test_split
x_train,x_test,y_train,y_test=train_test_split(X,Y,test_size = 0.2,random_state=0)
from sklearn.ensemble import RandomForestRegressor
from sklearn.metrics import mean_squared_error
from sklearn.metrics import r2_score

```

```

for i in range(1,100):
    RF = RandomForestRegressor(
        random_state=0,
        n_estimators=46,
        max_depth=20,
        min_samples_split=8,
        max_features=4
    )
    RF.fit(x_train,y_train)
    y_pred = RF.predict(x_test)

    score =r2_score(y_test,y_pred)
# 模型得分
    print("i="+str(i)+"得分",score)

```

```

RF = RandomForestRegressor(
    random_state=0,
    n_estimators=46,
    max_depth=20,
    min_samples_split=8,
    max_features=4
)
RF.fit(x_train,y_train)
y_pred = RF.predict(x_test)
R2 = r2_score(y_test,y_pred)
R2

```

0.8548904323288249

Figure S6. random forest regression model  
code of AOP key event of PAEs endocrine disrupting effect

```

import numpy as np
import pandas as pd
import matplotlib.pyplot as plt
pd.set_option('display.max_rows',None)
pd.set_option('display.max_columns',None)
data=pd.read_excel('C:\\Users\\WIN11\\Desktop\\study\\55.xlsx')
X=data.iloc[:,2:]
Y=data.iloc[:,1]
from sklearn.model_selection import train_test_split
x_train,x_test,y_train,y_test=train_test_split(X,Y,test_size = 0.2,random_state=0)
from sklearn.ensemble import RandomForestRegressor
from sklearn.metrics import mean_squared_error
from sklearn.metrics import r2_score

```

```

for i in range(1,100):
    RF = RandomForestRegressor(
        random_state=20,
        n_estimators=5,
        max_depth=20,
        max_features=5,
        min_samples_split=5
    )
    RF.fit(x_train,y_train)
    y_pred = RF.predict(x_test)

    score =r2_score(y_test,y_pred)
# 模型得分
    print("i="+str(i)+"得分",score)

```

```

RF = RandomForestRegressor(
    random_state=20,
    n_estimators=5,
    max_depth=20,
    max_features=5,
    min_samples_split=5
)
RF.fit(x_train,y_train)
y_pred = RF.predict(x_test)
R2 = r2_score(y_test,y_pred)
R2

```

0.7505073863664207

Figure S7. random forest regression model  
code of AOP adverse ending of PAEs endocrine disrupting effect

```

import numpy as np
import pandas as pd
import matplotlib.pyplot as plt
pd.set_option('display.max_rows',None)
pd.set_option('display.max_columns',None)

data=pd.read_excel('C:\\Users\\WIN11\\Desktop\\study\\22.xlsx')
X=data.iloc[:,2:]
Y=data.iloc[:,1]
from sklearn.model_selection import train_test_split
x_train,x_test,y_train,y_test=train_test_split(X,Y,test_size = 0.3,random_state=0)
from xgboost import XGBRegressor
import xgboost as xgb
from sklearn.metrics import mean_squared_error
from sklearn.metrics import r2_score

C:\Users\WIN11\Desktop\1\lib\site-packages\xgboost\compat.py:36: FutureWarning: pandas.Int64Index is deprecated and will be removed from pandas in a future version. Use pandas.Index with the appropriate dtype instead.
  from pandas import MultiIndex, Int64Index

xgb_model=xgb.XGBRegressor(
    n_estimators=17,
    max_depth=2,
    random_state=0,
    eta=0.8,
    gamma=3,
    max_delta_step=61,
)
xgb_model.fit(x_train,y_train)
y_pred = xgb_model.predict(x_test)
R2 = r2_score(y_test,y_pred)
R2

C:\Users\WIN11\Desktop\1\lib\site-packages\xgboost\data.py:250: FutureWarning: pandas.Int64Index is deprecated and will be removed from pandas in a future version. Use pandas.Index with the appropriate dtype instead.
  elif isinstance(data.columns, (pd.Int64Index, pd.RangeIndex)):

0.8592365821546417

```

Figure S8. XGboost regression model code  
of AOP initial event of PAEs endocrine disrupting effect

```

import numpy as np
import pandas as pd
import matplotlib.pyplot as plt
pd.set_option('display.max_rows',None)
pd.set_option('display.max_columns',None)
data=pd.read_excel('C:\\Users\\WIN11\\Desktop\\study\\33.xlsx')
X=data.iloc[:,2:]
Y=data.iloc[:,1]
from sklearn.model_selection import train_test_split
x_train,x_test,y_train,y_test=train_test_split(X,Y,test_size = 0.2,random_state=0)
from xgboost import XGBRegressor
import xgboost as xgb
from sklearn.metrics import mean_squared_error
from sklearn.metrics import r2_score

```

```

for i in range(1,100):
    xgb_model=xgb.XGBRegressor(
        random_state=12,
        n_estimators=20,
        max_depth=20,
        eta=0.4,
        subsample=0.8,
        gamma=4,
        alpha=3,
        colsample_bytree=0.9
    )
    xgb_model.fit(x_train,y_train)
    y_pred = xgb_model.predict(x_test)

    score = r2_score(y_test,y_pred)
# 模型得分

    print("i="+str(i)+"得分",score)

```

```

xgb_model=xgb.XGBRegressor(
    random_state=12,
    n_estimators=20,
    max_depth=20,
    eta=0.4,
    subsample=0.8,
    gamma=4,
    alpha=3,
    colsample_bytree=0.9
)
xgb_model.fit(x_train,y_train)
y_pred=xgb_model.predict(x_test)
R2 = r2_score(y_test,y_pred)
R2

```

C:\Users\WIN11\Desktop\1\lib\site-packages\xgboost\data.py:250: FutureWarning: pandas.Int64Index is deprecated and will be removed from pandas in a future version. Use pandas.Index with the appropriate dtype instead.

```

elif isinstance(data.columns, (pd.Int64Index, pd.RangeIndex)):

```

0.8359270436326218

Figure S9. XGboost regression model code  
of AOP key event of PAEs endocrine disrupting effect

```

import numpy as np
import pandas as pd
import matplotlib.pyplot as plt
pd.set_option('display.max_rows', None)
pd.set_option('display.max_columns', None)
data=pd.read_excel('C:\\Users\\WIN11\\Desktop\\study\\55.xlsx')
X=data.iloc[:,2:]
Y=data.iloc[:,1]
from sklearn.model_selection import train_test_split
x_train,x_test,y_train,y_test=train_test_split(X,Y,test_size = 0.2,random_state=0)
from xgboost import XGBRegressor
import xgboost as xgb
from sklearn.metrics import mean_squared_error
from sklearn.metrics import r2_score

```

```

for i in range(1,100):
    xgb_model=xgb.XGBRegressor(
        min_child_weight=3,
        max_depth=3,
        subsample=0.69,
        eta=0.5
    )
    xgb_model.fit(x_train,y_train)
    y_pred = xgb_model.predict(x_test)

    score = r2_score(y_test,y_pred)
# 模型得分

print("i="+str(i)+"得分",score)

```

```

xgb_model=xgb.XGBRegressor(
    min_child_weight=3,
    max_depth=3,
    subsample=0.69,
    eta=0.5,
)
xgb_model.fit(x_train,y_train)
y_pred = xgb_model.predict(x_test)
R2 = r2_score(y_test,y_pred)
R2

```

C:\Users\WIN11\Desktop\1\lib\site-packages\xgboost\data.py:250: FutureWarning: pandas.Int64Index is deprecated and will be removed from pandas in a future version. Use pandas.Index with the appropriate dtype instead.

```

elif isinstance(data.columns, (pd.Int64Index, pd.RangeIndex)):

```

0.9481267975614578

Figure S10. XGboost regression model code  
of AOP adverse ending of PAEs endocrine disrupting effect
