# Supplementary material for: Human Endocrine-Disrupting Effects of Phthalate Esters through Adverse Outcome Pathways: A Comprehensive Mechanism Analysis
Source: Int J Mol Sci. 2023 Aug 31;24(17):13548. doi: 10.3390/ijms241713548 (PMC10488033; doi:10.3390/ijms241713548)
Supplement: Supplementary file 1 [file ijms-24-13548-s001.zip › Supplementary Material.xlsx]

## Sheet: Table S1
Table S1 PAEs molecular eigenvalue sensitivity analysis table
		MIEs						KEs						AE
		0.1	0.2	0.3	0.4	0.5	average	0.1	0.2	0.3	0.4	0.5	average	0.1	0.2	0.3	0.4	0.5	average
The random forest model	Mol.Wt.	0.239564	0.362114	0.392626	0.36707	0.346937	0.341662	-0.00534857	0.0011114	0.00143381	0.00227067	0.00265557	0.000424573	1.21032	1.009	0.841538	0.728003	0.650763	0.887925
	tPSA	-0.14224	-0.0775854	-0.0560339	-0.0452581	-0.0387927	-0.071982	-0.00670062	-0.00365488	-0.00263964	-0.00213202	-0.00182744	-0.00339092	0.598969	0.32671	0.235957	0.190581	0.163355	0.303114
	DM	-0.14224	-0.0775854	-0.0560339	-0.0452581	-0.0387927	-0.071982	-0.000359203	0.00299647	0.0111898	0.00983478	0.0108989	0.00691215	0.598969	0.32671	0.235957	0.190581	0.163355	0.303114
	QYY	-0.14224	-0.0775854	-0.0560339	-0.0452581	-0.0387927	-0.071982	-0.0057022	-0.00274764	-0.00163474	-0.00132037	-0.000686957	-0.00241838	0.598969	0.32671	0.235957	0.190581	0.163355	0.303114
	QXY	-0.14224	-0.0775854	-0.0560339	-0.0452581	-0.0387927	-0.071982	-0.00660578	-0.00360316	-0.0026416	-0.0021336	-0.0018288	-0.00336259	0.614788	0.335339	0.242189	0.195614	0.171971	0.31198
	QXZ	-0.14224	-0.0775854	-0.0560339	-0.0452581	-0.0387927	-0.071982	-0.00555338	-0.0021676	-0.00162848	-0.00131531	-0.00112741	-0.00235844	0.598969	0.32671	0.235957	0.190581	0.163355	0.303114
	QYZ	-0.14224	-0.0775854	-0.0560339	-0.0452581	-0.0387927	-0.071982	-0.00725026	-0.00371827	-0.00215598	-0.00188872	-0.00161891	-0.00332643	0.598969	0.32671	0.235957	0.190581	0.163355	0.303114
	Q+	-0.14224	-0.0775854	-0.0560339	-0.0452581	-0.0387927	-0.071982	0.0168714	0.0092026	0.00664633	0.00536819	0.0046013	0.00853797	2.04032	1.1129	0.803762	0.649192	0.55645	1.03252
	QH+	0.740563	0.479357	0.346202	0.279625	0.239679	0.417085	-0.00403683	-0.00220191	-0.00159027	-0.00128445	-0.00110095	-0.00204288	0.395492	0.215723	0.1558	0.125839	0.107862	0.200143
	LUMO	-0.14224	-0.0775854	-0.0560339	-0.0452581	-0.0387927	-0.071982	-0.00642734	-0.00345101	-0.00249239	-0.00201309	-0.0017255	-0.00322187	0.598969	0.32671	0.235957	0.190581	0.163355	0.303114
	EG	-0.14224	-0.0775854	-0.0560339	-0.0452581	-0.0387927	-0.071982	-0.00915598	-0.00499417	-0.0036069	-0.00291327	-0.00249708	-0.00463348	0.598969	0.32671	0.235957	0.190581	0.163355	0.303114
	Infrared	-0.18754	-0.102294	-0.0738793	-0.0596718	-0.0511472	-0.0949065	-0.00678969	-0.00318613	-0.00204558	-0.00146713	-0.00122264	-0.00294224	0.517905	0.282493	0.204023	0.164788	0.141247	0.262091
	Raman	-0.231631	-0.126344	-0.0912487	-0.0737009	-0.0631722	-0.11722	-0.0033681	-0.00118277	-0.000337837	0.000142424	0.000122078	-0.000924842	0.56783	0.26856	0.158736	0.124112	0.106382	0.245124
	nAromBond	-0.14224	-0.0775854	-0.0560339	-0.0452581	-0.0387927	-0.071982	-0.00670062	-0.00365488	-0.00263964	-0.00213202	-0.00182744	-0.00339092	0.598969	0.32671	0.235957	0.190581	0.163355	0.303114
	BCUTc-1h	-0.153654	-0.0838115	-0.0605305	-0.04889	-0.0419057	-0.0777584	-0.00831571	-0.00453584	-0.00327589	-0.00264591	-0.00226792	-0.00420825	0.364457	0.198794	0.143574	0.115963	0.0993972	0.184437
	minHCsats	-0.14224	-0.0775854	-0.0560339	-0.0452581	-0.0387927	-0.071982	-0.0064481	-0.00340417	-0.00229539	-0.00182102	-0.00156088	-0.00310591	0.598969	0.32671	0.235957	0.190581	0.163355	0.303114
	MDEC-22	-0.14224	-0.0775854	-0.0560339	-0.0452581	-0.0387927	-0.071982	-0.00693036	-0.0037802	-0.00286782	-0.00231632	-0.0019201	-0.00356296	0.544272	0.296875	0.192635	0.137815	0.118127	0.257945
	MDEC-33	-0.14224	0.202908	0.146545	0.144128	0.145289	0.0993259	-0.00989433	-0.0135022	-0.0100289	-0.00824169	-0.00740337	-0.00981412	0.598969	0.32671	0.235957	0.190581	0.163355	0.303114
	JGI7	0.0209499	0.0517409	0.0373685	0.0728906	0.0790094	0.0523919	-0.0095054	-0.00636685	-0.00646879	-0.00490106	-0.0037961	-0.00620764	0.29937	0.136553	0.0628367	0.0507527	0.0089829	0.111699
The XGboost model	Mol.Wt.	0.58724	0.484406	0.540645	0.479829	0.423638	0.503152	0.018115	0.0407475	0.0357138	0.034936	0.0365644	0.0332154	1.1179	0.860308	0.696359	0.636754	0.564926	0.775249
	tPSA	0.282895	0.154306	0.111443	0.090012	0.0771531	0.143162	0.00194762	0.00106234	0.000767245	0.000619698	0.00053117	0.000985615	0.0118916	0.00648635	0.00468458	0.0037837	0.00324317	0.00601789
	DM	0.135018	0.0736461	0.0531889	0.0429602	0.0368231	0.0683272	0.00194762	0.00106234	0.000767245	0.000619698	0.00053117	0.000985615	-0.0538849	-0.0597481	-0.0517479	-0.0417963	-0.0358254	-0.0486005
	QYY	0.123892	0.0675776	0.0114298	0.00739013	0.00136278	0.0423305	0.00194762	0.00106234	0.0035174	0.00284098	0.00243512	0.00236069	-0.0213388	-0.0792615	-0.0572444	-0.0462359	-0.0396307	-0.0487423
	QXY	0.135018	0.0736461	0.0531889	0.0429602	0.0368231	0.0683272	0.00194762	0.00106234	-0.000478363	-0.00038637	-0.000331174	0.000362811	0.0114353	0.00782878	-0.0071739	-0.00608627	-0.00790834	-0.000380878
	QXZ	0.135018	0.0736461	0.0531889	0.0429602	0.0340186	0.0677663	-0.00189456	-0.0010334	-0.000746344	-0.000602816	-0.000516699	-0.000958764	0.0172682	0.00941903	0.00694183	0.0064684	0.00554434	0.00912837
	QYZ	0.135018	0.0736461	0.0531889	0.0429602	0.0368231	0.0683272	0.00194762	0.00106234	0.000767245	0.000619698	0.00053117	0.000985615	0.0139989	0.00763576	-0.0476496	-0.0384862	-0.0144728	-0.0157948
	Q+	0.135018	0.0736461	0.0531889	0.0429602	0.0368231	0.0683272	0.0170257	0.00928677	0.00670711	0.00541728	0.00464339	0.00861606	0.869738	0.474403	0.342624	0.276735	0.237201	0.44014
	QH+	0.694571	0.504989	0.364714	0.294577	0.252495	0.422269	0.0119909	0.0065405	0.00472369	0.00381529	0.00327025	0.00606813	-0.284729	-0.155307	-0.112166	-0.0905955	-0.0776533	-0.14409
	LUMO	0.135018	0.0736461	0.0531889	0.0429602	0.0368231	0.0683272	0.00505222	0.00275576	0.00199027	0.00160753	0.00137788	0.00255673	0.241753	0.146809	0.106028	0.0856384	0.0734043	0.130726
	EG	0.135018	0.0736461	0.0531889	0.0429602	0.0368231	0.0683272	0.00194762	0.00106234	0.000767245	0.000619698	0.00053117	0.000985615	-0.259944	-0.141787	-0.102402	-0.0827094	-0.0708937	-0.131547
	Infrared	0.135018	0.0736461	0.0531889	0.0429602	0.0368231	0.0683272	0.00194762	0.00106234	0.000767245	0.000619698	0.00053117	0.000985615	-0.00449242	-0.0119316	-0.0086173	-0.00696012	-0.00596582	-0.00759346
	Raman	0.135018	0.0736461	0.0531889	0.0429602	0.0368231	0.0683272	0.0177401	0.014772	0.0185688	0.0167864	0.0147117	0.0165158	-0.000477335	0.01065	0.00816214	0.00307799	0.00861853	0.00600627
	nAromBond	0.135018	0.0736461	0.0531889	0.0429602	0.0368231	0.0683272	0.00194762	0.00106234	0.000767245	0.000619698	0.00053117	0.000985615	0.0118916	0.00648635	0.00468458	0.0037837	0.00324317	0.00601789
	BCUTc-1h	0.135018	0.0736461	0.0531889	0.0429602	0.0368231	0.0683272	-0.0256464	-0.0139889	-0.0101031	-0.00816021	-0.00699446	-0.0129786	0.0217706	0.0118749	0.00857629	0.006927	0.00593743	0.0110172
	minHCsats	0.113047	0.044024	0.0277392	0.00822746	0.00748577	0.0401047	0.00194762	0.00106234	0.000767245	0.000619698	0.00053117	0.000985615	0.198983	0.144516	0.105069	0.0853843	0.0731866	0.121428
	MDEC-22	0.135018	0.0736461	0.0531889	0.0429602	0.0368231	0.0683272	0.00194762	0.00106234	0.000767245	0.000619698	0.00053117	0.000985615	0.0118916	-0.00268479	-0.043001	-0.0347316	-0.0297699	-0.0196591
	MDEC-33	0.2033	0.429709	0.337458	0.294168	0.270417	0.30701	0.00194762	0.00106234	0.000767245	0.000619698	0.00053117	0.000985615	0.229891	0.125395	0.101059	0.0900601	0.0771943	0.12472
	JGI7	0.152049	0.0921967	0.0732539	0.0591666	0.0507142	0.0854761	0.00399338	0.00217821	0.00157315	0.00127062	0.0010891	0.00202089	0.0182156	0.0140442	0.01123	0.00907039	0.00896524	0.0123051
